# Supplementary material for: Indocyanine green-loaded gold nanostars for sensitive SERS imaging and subcellular monitoring of photothermal therapy
Source: Royal Society of Chemistry journal article supplement (doi:10.1039/c7nr02798b), 2017-01-01
Supplement: c7nr02798b1.pdf [file c7nr02798b1.pdf]

# Indocyanine green-loaded gold nanostars for sensitive SERS imaging and subcellular monitoring of photothermal therapy

Jing Chen,<sup>1</sup> Zonghai Sheng,<sup>2</sup> Penghui Li,<sup>3</sup> Manxiang Wu,<sup>4</sup> Nisi Zhang,<sup>2</sup> Xue-Feng Yu,<sup>3</sup> Yuanwen Wang,<sup>1</sup> Dehong Hu,<sup>2</sup> Hairong Zheng,<sup>\*2</sup> Guo Ping Wang<sup>\*1</sup>

<sup>1</sup>College of Electronic Science and Technology, Guangdong Provincial Key Laboratory of Micro/Nano Optomechatronics Engineering and Key Laboratory of Optoelectronic Devices and Systems of Ministry of Education and Guangdong Province, Shenzhen University, Shenzhen 518060, China. E-mail: gpwang@szu.edu.cn

<sup>2</sup>Paul C. Lauterbur Research Center for Biomedical Imaging, Institute of Biomedical and Health Engineering, Shenzhen Institutes of Advanced Technology, Chinese Academy of Sciences, Shenzhen 518055, China. E-mail: hr.zheng@siat.ac.cn

<sup>3</sup>Institute of Biomedicine and Biotechnology, Shenzhen Institutes of Advanced Technology, Chinese Academy of Sciences, Shenzhen 518055, China.

<sup>4</sup>Department of Medicine Ultrasonics, Nanfang Hospital, Southern Medical University, Guangzhou, China.

## Enhancement Factor (EF) Calculation

To calculate the EF of GNS-ICG-BSA SERS nanotags, a 10<sup>-2</sup> M of ICG solution is used for normal Raman detection, and 10 μL of GNS-ICG-BSA solution with the adsorbed ICG concentration of 10<sup>-4</sup> M is used for SERS detection.

The most widely used definition for EF is<sup>[1]</sup>

$$EF = \frac{I_{surf}}{I_{bulk}} \times \frac{N_{bulk}}{N_{surf}}$$

where  $I_{surf}$  and  $I_{bulk}$  are the integrated intensities of ICG molecules adsorbed on GNS-ICG-BSA SERS nanoprobe and from 10<sup>-2</sup> M of ICG bulk solution, respectively.  $N_{surf}$  and  $N_{bulk}$  are the corresponding numbers of ICG molecules adsorbed on GNS-ICG-BSA SERS nanoprobe and in the bulk solution effectively illuminated by the laser beam, respectively.

$$N_{bulk} = Ahc_{bulk}N_A$$

where  $A$  is the area of the laser focal spot,  $h$  is the confocal depth of the laser, and  $h$  is 13 μm according to our previous work,<sup>[2]</sup>  $c_{bulk}$  is the concentration of ICG bulk

solution, here  $c_{bulk}=10^{-2}$  M,  $N_A$  is the Avogadro constant.

$$N_{surf} = \frac{c_{surf} v N_A A}{\pi r^2}$$

where  $c_{surf}$  is the concentration of ICG molecules adsorbed on GNS-ICG-BSA SERS nanoprobes, here  $c_{surf}=10^{-4}$  M.  $v$  is the volume of ICG solution contained in 10  $\mu$ L of GNS-ICG-BSA solution. According to the procedure 2.2 in the manuscript, the ratio of ICG reporter solution to GNS-ICG-BSA solution is 0.03, so here  $v$  is 0.3  $\mu$ L.  $r$  is the radius of 10  $\mu$ L of GNS-ICG-BSA solution formed on the silicon substrate,  $r=3.5$  mm.

Figure S1a, S1b are the normal Raman spectrum of  $10^{-2}$  M ICG solution and SERS spectrum of  $10^{-4}$  M GNS-ICG-BSA solution, respectively. The integrated intensities of the bands for  $I_{bulk}$  ( $1431\text{ cm}^{-1}$ ) and  $I_{surf}$  ( $1444\text{ cm}^{-1}$ ) are 3089 and 373862 cps, respectively. Considering the different number of molecules in each unit volume for normal Raman spectrum and SERS spectrum acquisition,<sup>[2]</sup>  $I_{surf} / I_{bulk} = 373862 \times 10^2 / 3089$ .

Finally, the EF of GNS-ICG-BSA SERS nanoprobes can be calculated as  $2.02 \times 10^6$ .

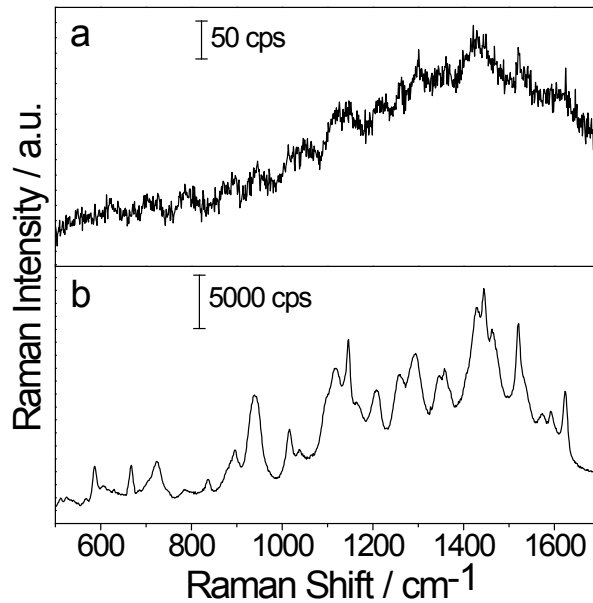

Figure S1 (a) Normal Raman spectrum of  $10^{-2}$  M ICG solution. Laser power: 15.7 mW. (b) SERS spectrum of  $10^{-4}$  M GNS-ICG-BSA solution. Laser power: 15.7 mW.

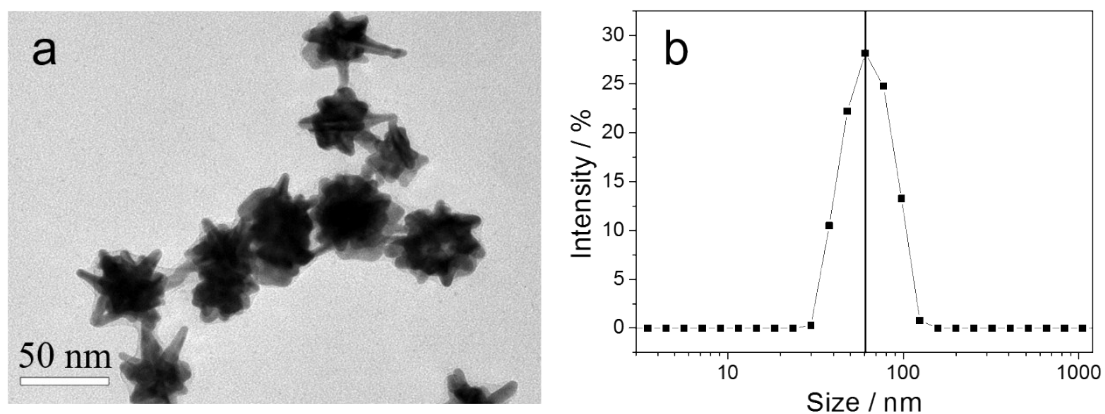

Figure S2 (a) TEM image and (b) size distribution of GNS-ICG-BSA nanoprobe after laser irradiation (808 nm, 3.0 W/cm<sup>2</sup>) for 7 min.

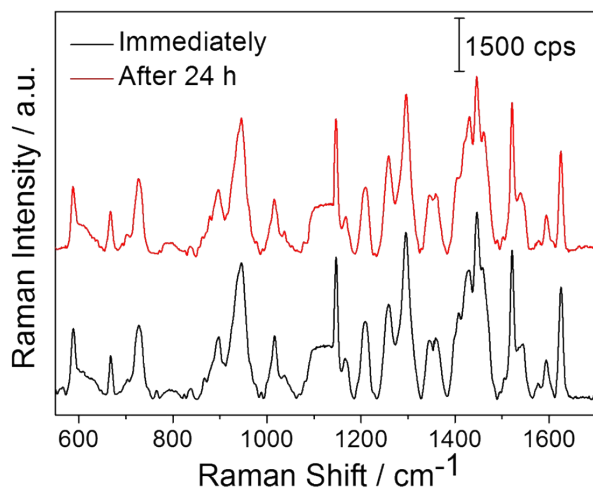

Figure S3 GNS-ICG-BSA nanotags were heated to 45 °C by 808 nm laser (1.0 W/cm<sup>2</sup>), and the SERS spectra were acquired immediately and after the storage at room temperature for 24 h, respectively.

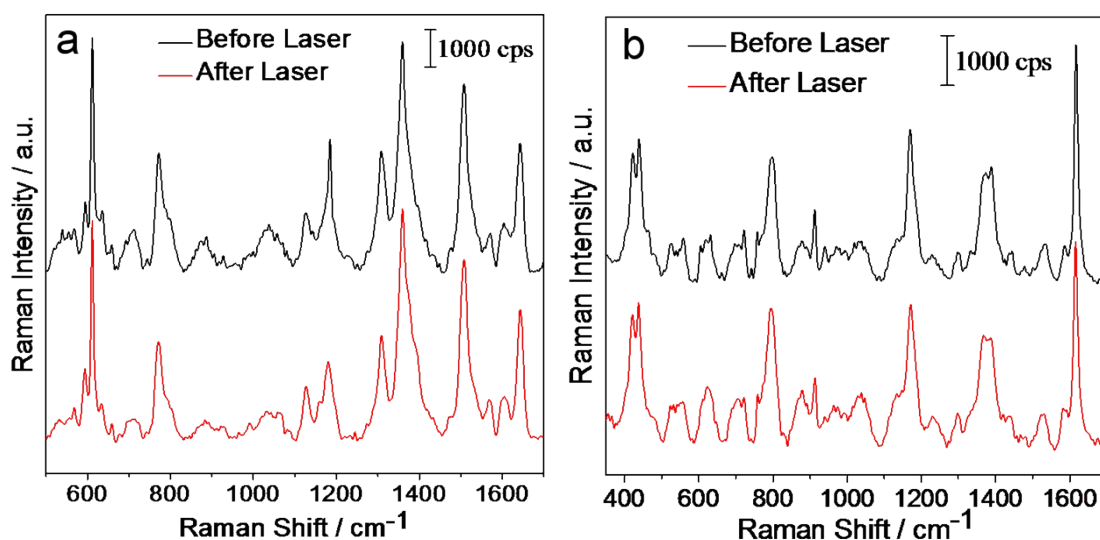

Figure S4 The SERS spectra of (a) GNS-R6G-BSA and (b) GNS-CV-BSA nanotags without and with 808 nm laser irradiation.

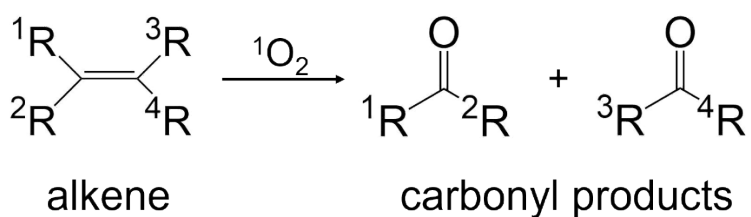

Scheme S1 Schematic diagram of ICG decomposition mechanism upon laser irradiation. An alkene (double bond in a polymethine chain) with a general structure is shown, and  ${}^1\text{R}$  to  ${}^4\text{R}$  represent different functional groups.

## References

- [1] E. C. Le Ru, E. Blackie, M. Meyer and P. G. Etchegoin, J. Phys. Chem. C 2007, 111, 13794.
- [2] J. Chen, B. Shen, G. W. Qin, X. W. Hu, L. H. Qian, Z. W. Wang, S. Li, Y. P. Ren and L. Zuo, J. Phys. Chem. C, 2012, 116, 3320.
